# Supplementary material for: PyRINEX: a new multi-purpose Python package for GNSS RINEX data
Source: PeerJ journal article supplement (doi:10.7717/peerj-cs.1800), 2024-01-16
Supplement: Appendix2_Running_speed_test_of_PyRINEX.pdf [file Appendix2_Running_speed_test_of_PyRINEX.pdf]

## Running speed test of PyRINEX

This running speed test uses AMD Ryzen Threadripper 2970WX 24-Core Processor, 3000 Mhz, 24 cores, 48 logical processors. Timing using Python's time library.

```
start_time = time.time()
QualityCheck("30122231.13o")
end_time = time.time()
duration = end_time - start_time
print("RUNNING TIME: ", duration, "s")
```

azi\_ele0

QualityCheck x

C:\Users\Administrator\AppData\Local\Microsoft\Windows\CurrentVersion\Explorer\RecentItems\E:\PycharmProjects\NewPyRINEX\QualityCheck

```
ax = plt.subplot(111, polar=True)
RUNNING TIME: 9.613184452056885 s
```

When processing a RINEX data with eight hours of data recorded internally, the quality check would take about nine seconds.

```
start_time = time.time()
QualityCheck("30122231.13o")
end_time = time.time()
duration = end_time - start_time
print("RUNNING TIME: ", duration, "s")
```

QualityCheck x

C:\Users\Administrator\AppData\Local\Microsoft\Windows\CurrentVersion\Explorer\RecentItems\E:\PycharmProjects\NewPyRINEX\QualityCheck

```
RUNNING TIME: 2.0074539184570312 s
```

But if you choose not to output CSV files and schematics, it only takes about 2 seconds.

|                      |                        |                     |                      |
|----------------------|------------------------|---------------------|----------------------|
| 3.02                 | OBSERVATION DATA       | Mixed(MIXED)        | RINEX VERSION / TYPE |
| cnvtToRINEX 3.14.0   | convertToRINEX OPR     | 20210907 040721 UTC | PGM / RUN BY / DATE  |
| -----                |                        |                     | COMMENT              |
| XBN9A                |                        |                     | MARKER NAME          |
|                      |                        |                     | MARKER NUMBER        |
| GEODETIC             |                        |                     | MARKER TYPE          |
| -----                |                        |                     |                      |
| 2.10                 | OBSERVATION DATA       | G (GPS)             | RINEX VERSION / TYPE |
| Pinnacle 1.00        |                        | 16-NOV-08 16:01     | PGM / RUN BY / DATE  |
| build April 19, 2002 |                        |                     | COMMENT              |
| -Unknown-            | -Unknown-              |                     | OBSERVER / AGENCY    |
|                      | Begin Pinnacle project |                     | COMMENT              |
| 1115                 |                        |                     | COMMENT              |
|                      |                        |                     | COMMENT              |
|                      |                        |                     | COMMENT              |

We tested different versions of RINEX data for quality checks and found that they all worked properly.
